# Supplementary material for: Metabolic Profiling from an Asymptomatic Ferret Model of SARS-CoV-2 Infection
Source: MDPI journal article supplement (doi:10.3390/metabo11050327), 2021-05-19
Supplement: s1 [file s1]

# Metabolic Profiling from an Asymptomatic Ferret Model of SARS-CoV-2 Infection

David J. Beale <sup>1,\*</sup>, Rohan Shah <sup>1,2</sup>, Avinash V. Karpe <sup>1</sup>, Katie E. Hillyer <sup>1</sup>, Alexander J. McAuley <sup>3</sup>, Gough G. Au <sup>3</sup>, Glenn A. Marsh <sup>3</sup> and Seshadri S. Vasan <sup>3,4</sup>

<sup>1</sup> Land & Water, Commonwealth Scientific and Industrial Research Organisation, Dutton Park 4102, QLD, Australia; r.shah@csiro.au (R.S.); avinash.karpe@csiro.au (A.V.K.); katie.hillyer@csiro.au (K.E.H.)

<sup>2</sup> Department of Chemistry and Biotechnology, Faculty of Science, Engineering and Technology, Swinburne University of Technology, Hawthorn 3122, VIC, Australia; rshah@swin.edu.au (R.S.).

<sup>3</sup> Australian Centre for Disease Preparedness (ACDP), Commonwealth Scientific and Industrial Research Organisation, Geelong 3220, VIC, Australia; alex.mcauley@csiro.au (A.J.M.); gough.au@csiro.au (G.G.A.); glenn.marsh@csiro.au (G.A.M.); vasan.vasan@csiro.au (S.S.V.)

<sup>4</sup> Department of Health Sciences, University of York, York YO10 5DD, UK

\* Correspondence: david.beale@csiro.au; Tel.: +61-7-3833-5774

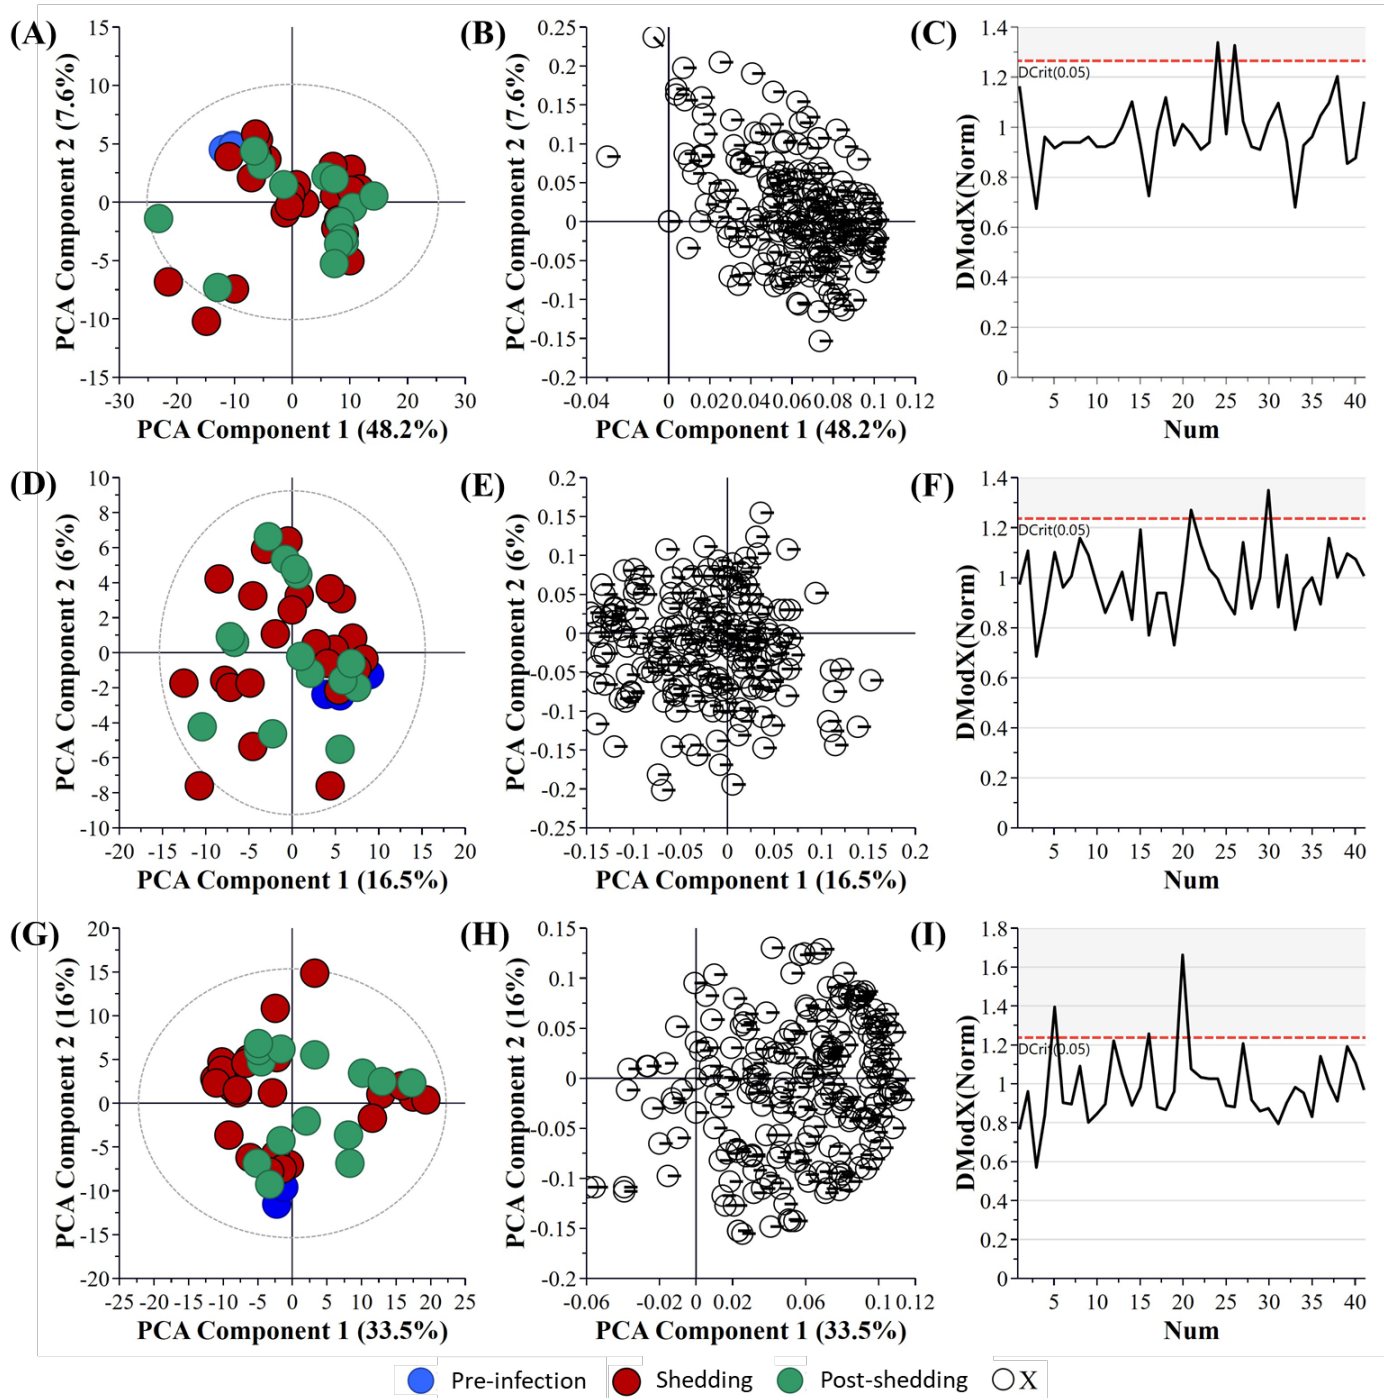

**Supplementary Figure S1.** PCA overview of the central carbon metabolite data analyzed in the nasal wash (A-C,  $R_2X = 0.656$ , and  $Q_2 = 0.476$ , DCrit value = 1.2648), oral swab (D-F,  $R_2X = 0.276$ , and  $Q_2 = 0.092$ , DCrit value = 1.2365), and rectal swab (G-I,  $R_2X = 0.595$ , and  $Q_2 = 0.459$ , DCrit value = 1.2365) samples pre-infection, during viral shedding, and post-viral shedding. (A, D, G) PLS-DA Score Scatter plot of metabolite data. (B, E, H) PLS-DA Loading Scatter plot of metabolite data. (C, F, I) DModX plot of metabolite data. The ellipse on the loadings scatter plots represents the 95% Hotelling's threshold. *Note, the ellipse presented in Figures S2A, S2D, and S2G represents Hotelling's T2 confidence limit (95%). Note: The colored circles in panel "A", "D", and "G" represent each analyzed sample, with the white circles representing the distribution of metabolite features between these groups.*

**Supplementary Table S1.** Identified significant metabolite clusters ( $p \leq 0.1$ ) during viral shedding and post-shedding using the central carbon metabolism metabolite dataset.

| Sample Type | Cluster name              | Cluster size | P-value | FDR     | Key compound                  | HMDB        | KEGG ID | Altered metabolites |
|-------------|---------------------------|--------------|---------|---------|-------------------------------|-------------|---------|---------------------|
| Nasal Wash  | Indoles                   | 4            | 0.0075  | 0.00005 | Indoline-2-carboxylate        | HMDB0002285 | NA      | 1                   |
|             | Adenine Nucleotides       | 5            | 0.0346  | 0.0066  | Adenosine 5-monophosphate     | HMDB0000045 | C00020  | 1                   |
|             | Succinates                | 5            | 0.0681  | 0.0066  | Succinic semialdehyde         | HMDB0001259 | C00232  | 2                   |
|             | Deoxycytosine Nucleotides | 3            | 0.0939  | 0.007   | 2-Deoxycytidine 5-diphosphate | HMDB0001245 | C00705  | 2                   |
|             | Dicarboxylic Acids        | 5            | 0.0190  | 0.0095  | Citramalic acid               | HMDB0000426 | C00815  | 0                   |
|             | Glutarates                |              | 0.0848  | 0.013   | 3-Methylglutaric acid         | HMDB0000752 | NA      | 0                   |
|             | Guanine Nucleotides       | 6            | 0.0647  | 0.024   | Deoxyguanosine 5-triphosphate | HMDB0001440 | C00286  | 3                   |
|             | Hydroxy Acids             | 4            | 0.0190  | 0.024   | Mevalonic acid                | HMDB0000227 | C00418  | 1                   |
|             | Hydroxybenzoates          | 6            | 0.0886  | 0.028   | m-Hydroxybenzoic acid         | HMDB0002466 | C00587  | 3                   |
|             | Pentoses                  | 3            | 0.0086  | 0.061   | L-Arabinose                   | HMDB0000646 | C11476  | 2                   |
|             | Pentanols                 | 2            | 0.0716  | 0.061   | Isopentyl acetate             | HMDB0031528 | C12296  | 1                   |
|             | Pentose phosphates        | 5            | 0.0650  | 0.061   | 2-Deoxyribose 5-phosphate     | HMDB0001031 | C00673  | 1                   |
|             | Sialic Acids              | 1            | 0.0778  | 0.065   | N-Acetylneuraminic acid       | HMDB0000230 | C19910  | 1                   |
| Oral Swab   | Tricarboxylic Acids       | 5            | 0.0157  | 0.12    | trans-Aconitic acid           | HMDB0000958 | C02341  | 2                   |
|             | Succinates                | 5            | 0.039   | 1       | Argininosuccinic acid         | HMDB0000052 | C03406  | 2                   |
|             | Hexose phosphates         | 4            | 0.0076  | 0.33    | D-Galactosamine               | NA          | C02262  | 2                   |
| Rectal Swab | Hydroxy acids             | 4            | 0.027   | 0.59    | Lactic acid                   | HMDB0144295 | C01432  | 2                   |

FDR: False Discovery Rate; HMDB: Human Metabolome Database; KEGG: Kyoto Encyclopedia of Genes and Genomes

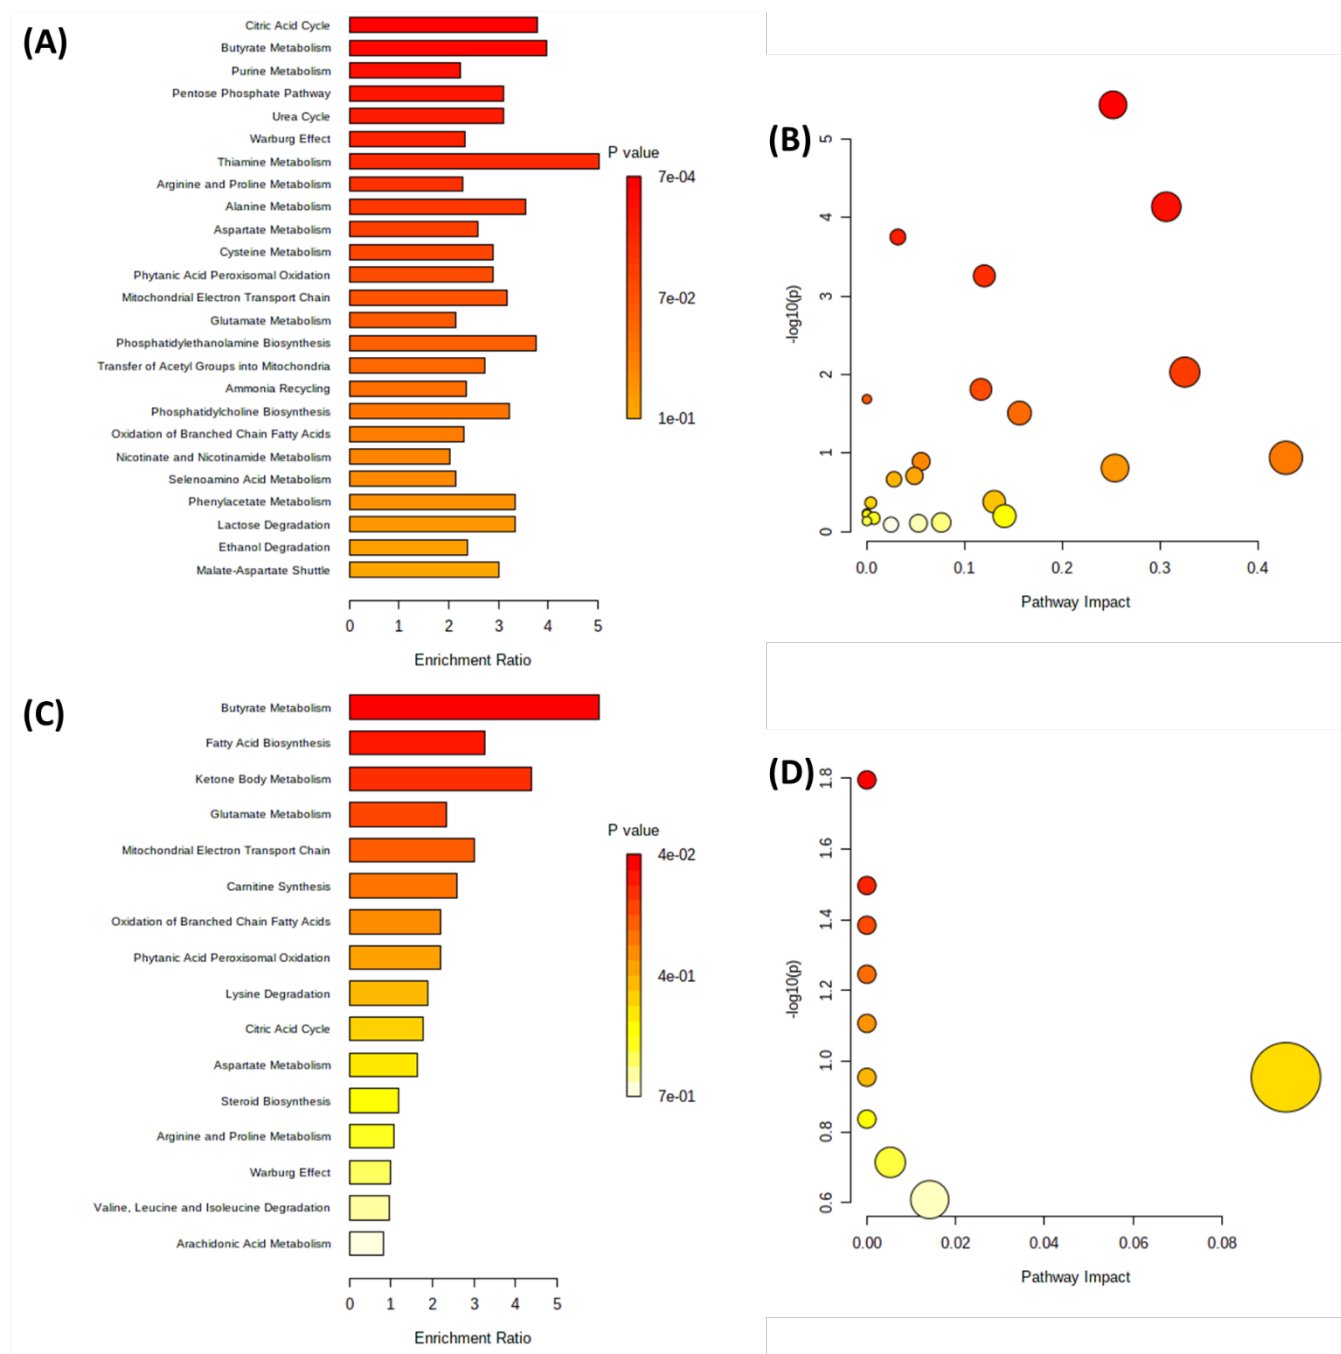

**Supplementary Figure S2.** Enrichment analysis of the identified metabolites of importance from nasal wash samples. (A) Metabolite enrichment analysis. (B) Metabolite pathway impact analysis. (C) Lipid enrichment analysis. (D) Lipid pathway impact analysis.

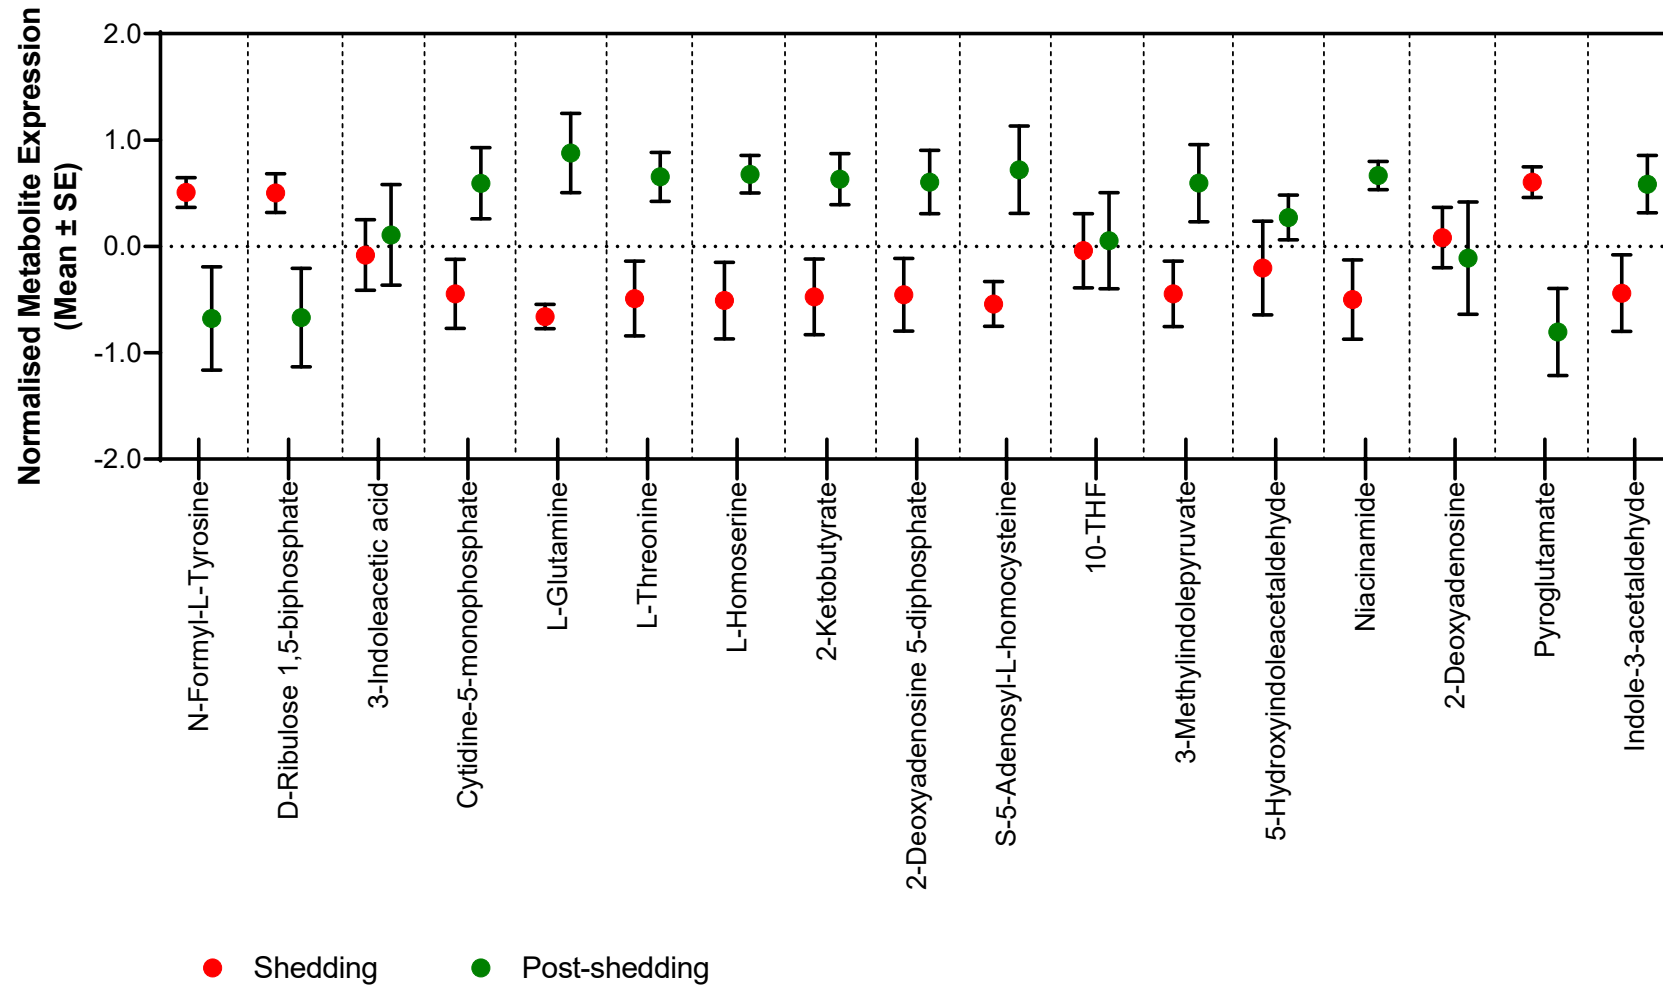

**Supplementary Figure S3:** Boxplot representing the data of individual significant metabolites from the key metabolism changes in a SARS-CoV-2 ferret model during viral shedding and post-shedding events. Normalized metabolite expression is determined as the mean  $\pm$  the standard error.

**Supplementary Table S2.** Significant metabolites identified from central carbon metabolism metabolite dataset.

| Metabolite                               | log2 (FC) | -log10 (p-value) | KEGG ID   | HMDB ID      | Elevated in |
|------------------------------------------|-----------|------------------|-----------|--------------|-------------|
| L-Cystine                                | 2.7682    | 2.1375           | C01420    | HMDB0000192  | SA01        |
| L-Methionine                             | 2.5291    | 1.5963           | C01733    | HMDB00033951 |             |
| L-Histidine                              | 2.0048    | 3.2117           | C00135    | HMDB0000177  |             |
| Pyridoxal hydrochloride                  | 1.8407    | 2.4058           | C00250    | HMDB0001545  |             |
| Cytidine 5-diphosphate                   | 1.1293    | 1.481            | C00112    | HMDB0001546  |             |
| L-Glutamine                              | 0.76587   | 9.3871           | C00064    | HMDB0000641  |             |
| L-Threonine                              | 0.74125   | 3.3936           | C00188    | HMDB0000167  |             |
| L-Homoserine                             | 0.64845   | 2.9521           | C00263    | HMDB0000719  |             |
| L-Dihydroorotic acid                     | 0.62133   | 2.0999           | C00337    | HMDB0003349  |             |
| 2-Deoxyribose 5-phosphate                | 0.58836   | 5.2058           | C00673    | HMDB0001031  |             |
| Itaconic acid                            | -0.62578  | 2.5257           | C00490    | HMDB0002092  | VIC01       |
| D-Gluconic acid                          | -0.69118  | 1.9507           | C00257    | HMDB0000625  |             |
| N-Formyl-L-Tyrosine                      | -0.77537  | 2.0569           | No result | No result    |             |
| Shikimic acid                            | -0.78933  | 2.5124           | C00493    | HMDB0003070  |             |
| N-Acetyl-alpha-D-glucosamine 1-phosphate | -0.8396   | 3.2117           | C04256    | HMDB0001367  |             |
| N-Acetyl-D-glucosamine 6-phosphate       | -0.8396   | 3.2117           | C00357    | HMDB0001062  |             |
| N-Acetyl D-galactosamine                 | -0.8726   | 1.5963           | C01132    | HMDB0000853  |             |
| Ketovaleric acid                         | -0.94453  | 2.477            | C06255    | HMDB0001865  |             |
| L-Malic acid                             | -1.0265   | 2.1663           | C00711    | HMDB0000744  |             |
| 3-Methylglutaric acid                    | -1.0438   | 3.2427           | No result | HMDB0000752  |             |
| Cellobiose                               | -1.053    | 1.3492           | C06422    | HMDB0000055  |             |
| 4-Guanidobutyric acid                    | -1.0534   | 2.1375           | C01035    | HMDB0003464  |             |
| L-Hydroxyglutaric acid                   | -1.1278   | 1.912            | C02630    | HMDB00059655 |             |
| Mevalonic acid                           | -1.1278   | 1.912            | C00418    | HMDB0000227  |             |
| Dihydroxyacetone phosphate               | -1.2088   | 1.5963           | C00111    | HMDB0001473  |             |
| 2-3-Dihydroxyisovalerate                 | -1.3219   | 1.3492           | C04039    | No result    |             |

**Supplementary Table S2 (continued).** Significant metabolites identified from central carbon metabolism metabolite dataset.

| Metabolite                       | log2 (FC) | -log10 (p-value) | KEGG ID | HMDB ID     | Elevated in |
|----------------------------------|-----------|------------------|---------|-------------|-------------|
| alpha-D-Glucose-1-phosphate      | -1.4665   | 1.3535           | C00103  | HMDB0001586 | VIC01       |
| Oxamic acid                      | -1.4678   | 5.0099           | C01444  | No result   |             |
| Homocitrate                      | -1.4685   | 1.3492           | C01251  | HMDB0003518 |             |
| D-Fructose 6-phosphate           | -1.6229   | 1.5051           | C00085  | HMDB0000124 |             |
| 2-Deoxyinosine                   | -1.6479   | 1.4177           | C05512  | HMDB0000071 |             |
| L-Glutamic acid                  | -1.7373   | 2.1375           | C00025  | HMDB0000148 |             |
| 4-Methyl-2-oxovaleric acid       | -1.8268   | 2.6782           | C00233  | HMDB0000695 |             |
| 2-3-Dihydroxybenzoic acid        | -1.8476   | 2.6638           | C00196  | HMDB0000397 |             |
| Uridine 5-monophosphate          | -1.9414   | 2.4376           | C00105  | HMDB0000288 |             |
| D-Ribulose 1,5-biphosphate       | -1.9674   | 2.4058           | C01182  | No result   |             |
| beta-Nicotinamide mononucleotide | -1.9977   | 1.6314           | C00455  | HMDB0000229 |             |
| 5-Hydroxy-3-indoleacetic acid    | -2.0265   | 2.1426           | C05635  | HMDB0000763 |             |
| Salicylic acid                   | -2.0703   | 2.4058           | C00805  | HMDB0001895 |             |
| 2-Deoxyadenosine                 | -2.1486   | 1.8156           | C00559  | HMDB0000101 |             |
| Orotic acid                      | -2.3856   | 2.5257           | C00295  | HMDB0000226 |             |
| Glyceric acid                    | -2.4357   | 6.9069           | C00258  | HMDB0000139 |             |
| 4-Hydroxybenzoic acid            | -2.4671   | 2.5257           | C00156  | HMDB0000500 |             |
| Xanthosine                       | -2.5255   | 2.5257           | C01762  | HMDB0000299 |             |
| m-Hydroxybenzoic acid            | -2.8056   | 2.5257           | C00587  | HMDB0002466 |             |
| DL-2-Aminoadipic acid            | -3.1699   | 3.2117           | C00956  | HMDB0000510 |             |
| 3-Hydroxyphenylacetic acid       | -3.1823   | 2.8092           | C05593  | HMDB0000440 |             |
| Arabinose-5-phosphate            | -3.3687   | 4.5317           | C01112  | HMDB0011734 |             |

**Supplementary Table S3.** Significant metabolites identified from untargeted metabolomics using LC-QToF-MS.

| Putatively Identified Metabolites   | Mass Error (ppm) | log2 (FC) | -log10 (p-value) | KEGG ID | HMDB ID     | Elevated in |
|-------------------------------------|------------------|-----------|------------------|---------|-------------|-------------|
| L-Serine                            | -7.61            | 4.1948    | 4.3568           | C00065  | HMDB0000187 |             |
| L-Leucine                           | 1.52             | 3.8207    | 1.3328           | C00123  | HMDB0000687 |             |
| L-Isoleucine                        | 1.52             | 3.8207    | 1.3328           | C00407  | HMDB0000172 |             |
| Arachidonic Acid                    | -10.83           | 3.8104    | 1.4151           | #N/A    | #N/A        |             |
| L-Alanine                           | 4.48             | 3.7569    | 1.976            | C00041  | HMDB0000161 |             |
| leukotriene-C4                      | -3.19            | 3.1122    | 2.09             | C02166  | #N/A        |             |
| N10-Formyltetrahydrofolic acid      | -7.39            | 3.0032    | 3.2109           | #N/A    | HMDB0000972 |             |
| 4-Hydroxybutanoic acid              | 6.72             | 2.0549    | 2.6513           | C00989  | #N/A        |             |
| 4-Hydroxyphenylpyruvic acid         | -0.55            | 1.963     | 2.6513           | C01179  | #N/A        | SA01        |
| L-Dopa                              | -5.07            | 1.743     | 1.6468           | C00355  | HMDB0000181 |             |
| Thiophene                           | 3.56             | 1.4386    | 1.6468           | #N/A    | HMDB0029718 |             |
| 5,10-Methylenetetrahydrofolate      | -0.87            | 1.3491    | 1.7646           | C00143  | #N/A        |             |
| L-Formylkynurenine                  | 16.90            | 1.2267    | 2.7231           | C02700  | HMDB0060485 |             |
| L-Tryptophan                        | 3.43             | 1.2154    | 1.361            | C00078  | HMDB0000929 |             |
| Nicotinamide adenine dinucleotide   | 1.06             | 1.1301    | 1.3328           | C00003  | #N/A        |             |
| D-Glutamine                         | 5.47             | 0.68765   | 2.6513           | C00819  | HMDB0003423 |             |
| L-threo-7,8-Dihydrobiopterin        | 0.418            | 0.66428   | 1.3666           | C20263  | #N/A        |             |
| 2,5-Dihydroxypyridine               | 0.90             | -0.6266   | 2.6513           | C01059  | #N/A        |             |
| N2-Acetyl-L-ornithine               | 2.30             | -1.2455   | 2.6513           | C00437  | #N/A        |             |
| Niacinamide                         | 1.53             | -1.5095   | 1.3666           | C00153  | HMDB0001406 |             |
| Nicotine imine                      | 7.61             | -1.5764   | 1.7116           | #N/A    | HMDB0001010 |             |
| 2-Hydroxyphenylacetic acid          | -0.29            | -1.6213   | 1.4151           | C05852  | HMDB0000669 |             |
| 2,3,6-Trihydroxypyridine            | 2.36             | -1.6277   | 2.3912           | C03458  | #N/A        | VIC01       |
| Quinic acid                         | -0.52            | -2.0971   | 2.0255           | C00296  | #N/A        |             |
| 2-Oxoarginine                       | -24.51           | -2.2389   | 1.7726           | C03771  | HMDB0004225 |             |
| Tryptamine                          | 1.57             | -2.2553   | 1.5488           | C00398  | HMDB0000303 |             |
| 2-amino-tetradecanoic acid          | 4.40             | -2.4455   | 3.4059           | #N/A    | #N/A        |             |
| enalaprilat (anhydrous)             | 0.51             | -2.5619   | 1.6438           | C11720  | HMDB0041886 |             |
| trans-3-Hydroxycotinine glucuronide | 2.81             | -2.642    | 1.5187           | #N/A    | HMDB0001204 |             |

**Supplementary Table S3 (continued).** Significant metabolites identified from untargeted metabolomics using LC-QToF-MS.

| Putatively Identified Metabolites        | Mass Error (ppm) | log2 (FC) | -log10 (p-value) | KEGG ID | HMDB ID     | Elevated in |
|------------------------------------------|------------------|-----------|------------------|---------|-------------|-------------|
| 2-amino tridecanoic acid                 | 3.58             | -2.7872   | 2.9742           | #N/A    | #N/A        |             |
| (Z)-5-Oxohex-2-enedioate                 | 0.00             | -3.3279   | 2.0398           | C03453  | #N/A        |             |
| 2'-Deoxyuridine                          | 2.63             | -3.3498   | 2.0204           | C00526  | #N/A        |             |
| Maleamic acid                            | -0.87            | -3.4589   | 3.1193           | C01596  | #N/A        |             |
| 5-Hydroxy-L-tryptophan                   | 0.49             | -3.4709   | 3.1564           | C00643  | HMDB0000472 |             |
| N-Acetyl-L-glutamic acid                 | 1.59             | -3.5539   | 4.9153           | C00624  | #N/A        | VIC01       |
| 5'-Butyrylphosphoinosine                 | -2.87            | -3.6568   | 4.2144           | C06435  | #N/A        |             |
| 2-Keto-6-acetamidocaproate               | 2.36             | -3.9522   | 3.2715           | C05548  | HMDB0012150 |             |
| 5-Hydroxyindoleacetyl glycine            | -0.03            | -4.0211   | 1.9645           | C05832  | HMDB0004185 |             |
| 4-(2-Aminophenyl)-2,4-dioxobutanoic acid | -0.97            | -4.0493   | 3.2687           | C01252  | #N/A        |             |
| Thymidine                                | 0.94             | -4.3172   | 1.4488           | C00214  | HMDB0000273 |             |
| L-Erythrulose                            | 11.17            | -6.2344   | 2.1279           | C02045  | HMDB0006293 |             |

**Supplementary Table S4.** Significant lipids identified from untargeted lipidomics using LC-QToF-MS

| Putatively Identified Lipids                        | Mass Error (ppm) | log2 (FC) | -log10 (p-value) | Elevated in |
|-----------------------------------------------------|------------------|-----------|------------------|-------------|
| PE(13:0/18:3(6Z,9Z,12Z))                            | -5.23            | 1.9716    | 3.3921           | SA01        |
| PE(14:0/22:2(13Z,16Z))                              | -0.28            | 0.92763   | 1.4637           |             |
| PE(15:1(9Z)/22:4(7Z,10Z,13Z,16Z))                   | -2.41            | 0.92124   | 1.35             |             |
| PE(12:0/18:2(9Z,12Z))                               | -4.11            | 0.90112   | 1.35             |             |
| PE(12:0/17:0)                                       | -6.41            | 0.76407   | 1.35             |             |
| PE(16:1(9Z)/22:6(4Z,7Z,10Z,13Z,16Z,19Z))            | 1.63             | -1.1496   | 1.35             | VIC01       |
| PE(12:0/20:4(5Z,8Z,11Z,14Z))                        | -1.33            | -1.2432   | 1.35             |             |
| PE(18:4(6Z,9Z,12Z,15Z)/22:6(4Z,7Z,10Z,13Z,16Z,19Z)) | -0.65            | -1.3902   | 1.4541           |             |
| PE(14:0/20:5(5Z,8Z,11Z,14Z,17Z))                    | 1.18             | -1.4124   | 1.4183           |             |
| PE(15:1(9Z)/22:6(4Z,7Z,10Z,13Z,16Z,19Z))            | 1.19             | -2.0691   | 1.7454           |             |

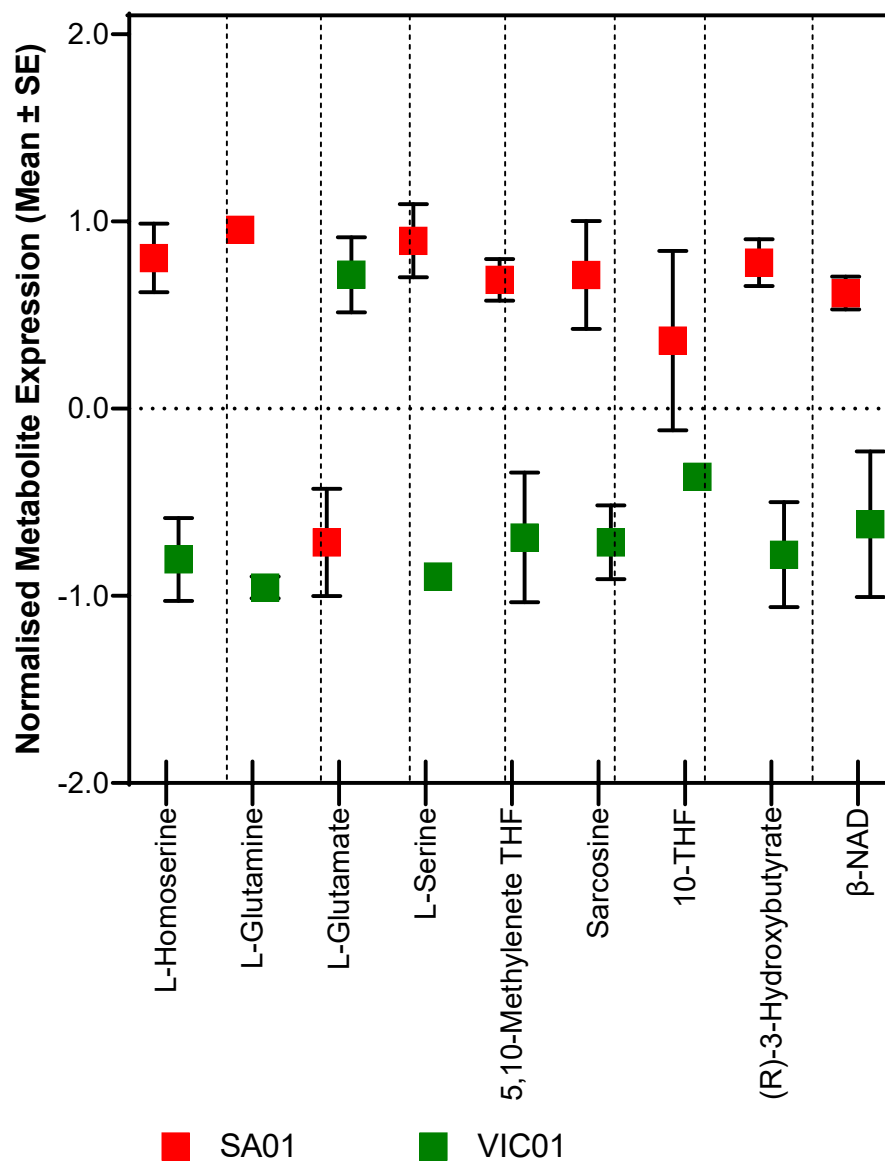

**Supplementary Figure S4** Boxplot representing the data of individual significant metabolites from the key metabolism changes in a SARS-CoV-2 ferret model infected with the SA01 isolate and VIC01 isolate during virus shedding. Normalized metabolite expression is determined as the mean  $\pm$  the standard error.

**Supplementary Table S5:** Mutations (>20% Frequency) in VIC01 and SA01 isolates relative to Wuhan-Hu-1 (NC\_045512)

| Isolate | Mutation        | Effect                  | Frequency (%) |
|---------|-----------------|-------------------------|---------------|
| VIC01   | T19065C         | Silent                  | 99.81         |
|         | T22303G         | S247R in Spike          | 99.94         |
|         | G26144T         | G251V in ORF3a          | 99.83         |
|         | 29750Del (10nt) | 10nt Deletion in 3' UTR | 76.51         |
| SA01    | C3037T          | Silent                  | 99.41         |
|         | C17074T         | L5604F in orf1ab        | 99.94         |
|         | 26284Del        | Loss of V14 in Envelope | 87.16         |
|         | C27213T         | Silent                  | 97.88         |
|         | T27384C         | Silent                  | 99.82         |
